# Supplementary material
Source: publisher site journal article supplement (https://www.dovepress.com/article/326716)
Supplement: Supplementary file 1 [file get_supplementary_file.php]

**Supplementary materials**

**Figure S1**

**Figure S1** Measurement of platelet aggregate formation with monocyte subsets, T cell subsets, NK cells and dendritic cell subsets.Identified subsets of immune cells were further checked for the co expression of platelet surface marker CD41a.CD 41a positive populations in corresponding immune cells were identified as platelet immune cell aggregate.

**Figure S2**

**Figure S2** Bubble graph for Biological processes and KEGG pathway enrichment analysis of cytokines modulated in type 2 diabetes associated with CAD. The analysis was performed using the AVID tool, providing the significantly enriched GO terms Biological Process, and KEGG pathways. The size of dots indicates the number of cytokines enriched in the pathway and the colour gradient represents the significance of the functional association (−log10 *p*-value). The horizontal axis shows fold enrichment which measures the magnitude of enrichment.

**Table S1:** **Univariate Logistic Regression Analysis of T2DM, CAD and T2DM+CAD vs control subjects**

| **Factor** | **T2DM vs Control** | | **CAD vs Control** | | **T2DM+CAD vs Control** | |
| --- | --- | --- | --- | --- | --- | --- |
| **OR (95% CI)** | **P-value** | **OR (95% CI)** | **P-value** | **OR (95% CI)** | **P-value** |
| **Clinical and biochemical characteristics** |  |  |  |  |  |  |
| Age (years) | 0.98 (0.92 – 1.06) | 0.631 | 1.12 (0.99 – 1.26) | 0.072 | 1.08 (0.98 – 1.19) | 0.134 |
| Gender (Female) | 0.36 (0.07 – 1.87) | 0.223 | 0.37 (0.06 – 2.37) | 0.292 | 0.45 (0.07 – 2.69) | 0.453 |
| Smoking | 1.49 (0.34 – 6.56) | 0.595 | 3.00 (0.28 – 32.46) | 0.366 | 2.14 (0.32 – 14.54) | 0.435 |
| Alcohol | 1.03 (0.17 – 6.31) | 0.971 | 1.87 (0.15 – 22.94) | 0.626 | 1.67 (0.27 – 10.38) | 0.584 |
| BMI (Obese) | 1.30 (0.40 – 4.25) | 0.665 | 1.78 (0.42 – 7.47) | 0.432 | 1.93 (0.50 – 7.48) | 0.344 |
| FBS(mg/dl) | 1.11 (1.03 – 1.19) | **0.009** | 0.97 (0.97 – 1.02) | 0.969 | 1.12 (1.04 – 1.20) | **0.002** |
| HbA1c (%) | - | **-** | 1.97 (0.51 – 7.63) | 0.325 | - | **-** |
| SBP(mmHg) | 1.05 (0.99 – 1.09) | 0.068 | 1.10 (1.01 – 1.20) | **0.024** | 1.23 (1.03 – 1.23) | **0.007** |
| DBP(mmHg) | 0.98 (0.92 – 1.05) | 0.633 | 1.17 (0.97 – 1.40) | 0.101 | 1.11 (0.95 – 1.30) | 0.175 |
| Creatinine (mg/dl) | 0.75 (0.11 – 5.20) | 0.775 | 6.20 (0.73 – 52.81) | 0.095 | 4.58 (0.48 – 44.03) | 0.188 |
| Uric Acid(mg/dl) | 0.80 (0.55 – 1.18) | 0.261 | 1.02 (0.68 – 1.54) | 0.912 | 0.78 (0.49 – 1.29) | 0.167 |
| Total Cholesterol (mg/dl) | 1.07 (1.01 – 1.14) | **0.017** | 1.03 (0.96 – 1.09) | 0.273 | 1.07 (1.01 – 1.13) | **0.026** |
| Triglycerides(mg/dl) | 1.05 (1.01 – 1.08) | **0.009** | 1.02 (0.99 – 1.04) | 0.197 | 1.04 (1.02 – 1.08) | **0.016** |
| HDL(mg/dl) | 1.02 (0.94 – 1.09) | 0.696 | 0.98 (0.90 – 1.08) | 0.749 | 1.07 (0.98 – 1.16) | 0.131 |
| LDL(mg/dl) | 1.10 (1.01 – 1.21) | **0.028** | 1.08 (0.96 – 1.23) | 0.210 | 1.10 (0.99 – 1.21) | 0.058 |
| **Monocytes subset** |  |  |  |  |  |  |
| Classical monocytes (%) | 0.91 (0.81 – 1.02) | 0.117 | 0.65 (0.48 – 0.89) | **0.005** | 0.83 (0.71 – 0.98) | **0.026** |
| Intermediate monocytes (%) | 1.36 (1.05 – 1.76) | **0.018** | 2.65 (1.43 – 4.94) | **0.002** | 1.44 (1.08 – 1.90) | **0.012** |
| Non-classical monocytes (%) | 1.13 (0.95 – 1.36) | 0.177 | 1.71 (1.21 – 2.44) | **0.003** | 1.14 (0.89 – 1.44) | 0.302 |
| **T cell subsets** |  |  |  |  |  |  |
| CD4 cells (%) | 1.09 (1.01 – 1.18) | **0.035** | 1.06 (0.96 – 1.17) | 0.252 | 1.09 (1.00 – 1.19) | 0.051 |
| CD8 cells (%) | 0.94 (0.86 – 1.03) | 0.193 | 0.90 (0.79 – 1.03) | 0.136 | 0.92 (0.83 – 1.02) | 0.119 |
| NKT cells (%) | 1.05 (0.82 – 1.33) | 0.713 | 0.99 (0.75 – 1.30) | 0.933 | 1.28 (0.97 – 1.71) | 0.083 |
| NK cells (%) | 1.13 (0.67 – 1.89) | 0.653 | 0.64 (0.31 – 1.36) | 0.247 | 1.32 (0.76 – 2.29) | 0.318 |
| **Dendritic cells and subset** |  |  |  |  |  |  |
| Dendritic cells (%) | 0.03 (0.001 – 0.99) | **0.049** | 0.01 (0.001 – 2.20) | 0.094 | 0.12 (0.003 – 4.34) | 0.248 |
| Myeloid dendritic cells (%) | 0.001 (0.00 – 0.70) | **0.039** | 0.00 (0.00 – 0.28) | **0.028** | 0.03 (0.00 – 9.41) | 0.237 |
| Plasmacytoid dendritic cells (%) | 0.00 (0.00 – 0.22) | **0.023** | 0.00 (0.00 – 0.00) | **0.007** | 0.00 (0.00 – 0.25) | **0.030** |
| **Platelet activation markers** |  |  |  |  |  |  |
| P-selectin Expression (%) | 1.10 (1.03 – 1.18) | **0.003** | 1.02 (0.96 – 1.09) | 0.475 | 1.16 (1.04 – 1.29) | **0.007** |
| Pac-1 Expression (%) | 2.20 (1.10 – 4.38) | **0.026** | 0.35 (0.001 – 20.77) | 0.613 | 8.76 (0.22 – 346.21) | 0.247 |
| **Platelets aggregate formation with innate immune cells** |  |  |  |  |  |  |
| Platelet-Monocyte aggregates (%) | 1.12 (1.05 – 1.91) | **0.001** | 1.01 (0.96 – 1.05) | 0.813 | 1.14 (1.05 – 1.23) | **0.002** |
| Platelet-Classical monocyte aggregates (%) | 1.11 (1.05 – 1.17) | **<0.001** | 1.04 (0.99 – 1.08) | 0.095 | 1.11 (1.04 – 1.18) | **0.001** |
| Platelet-Intermediate monocyte aggregates (%) | 1.17 (1.04 – 1.30) | **0.008** | 0.99 (0.92 – 1.06) | 0.666 | 1.26 (1.08 – 1.46) | **0.003** |
| Platelet-Non classical monocyte aggregates(%) | 1.10 (1.03 – 1.81) | **0.006** | 1.05 (0.99 – 1.12) | 0.091 | 1.15 (1.05 – 1.25) | **0.003** |
| Platelet-Neutrophil aggregates (%) | 1.67 (1.16 – 2.41) | **0.006** | 1.18 (1.04 – 1.34) | **0.012** | 1.30 (1.09 – 1.55) | **0.003** |
| Platelet-T cell aggregates (%) | 1.21 (1.06 – 1.38) | **0.005** | 1.18 (0.99 – 1.40) | 0.054 | 1.29 (1.09 – 1.52) | **0.002** |
| Platelet-CD4 cell aggregates (%) | 1.19 (1.04 – 1.38) | **0.013** | 1.11 (0.96 – 1.29) | 0.155 | 1.18 (1.03 – 1.35) | **0.014** |
| Platelet-CD8 cell aggregates (%) | 1.16 (1.03 – 1.29) | **0.011** | 1.17 (0.99 – 1.38) | 0.057 | 1.22 (1.06 – 1.40) | **0.005** |
| Platelet-NKT cell aggregates (%) | 1.04 (0.97 – 1.11) | 0.264 | 1.01 (0.94 – 1.09) | 0.793 | 1.02 (0.95 – 1.09) | 0.654 |
| Platelet-NK cell aggregates (%) | 1.08 (0.99 – 1.17) | 0.070 | 0.97 (0.87 – 1.09) | 0.646 | 1.22 (1.06 – 1.40) | **0.006** |
| Platelet-Dendritic cell aggregates (%) | 1.03 (0.98 – 1.08) | 0.300 | 0.99 (0.93 – 1.05) | 0.698 | 1.04 (0.99 – 1.10) | 0.134 |
| Platelet-Myeloid dendritic aggregates (%) | 1.05 (0.99 – 1.10) | 0.075 | 1.03 (0.97 – 1.09) | 0.400 | 1.05 (0.99 – 1.11) | 0.114 |
| Platelet-Plasmacytoid dendritic aggregates (%) | 1.03 (0.98 – 1.08) | 0.198 | 0.92 (0.85 – 0.99) | **0.022** | 1.02 (0.98 – 1.06) | 0.303 |

OD=Odds Ratio, CI= Confidence interval, BMI=Body mass index, FBS-Fasting blood sugar, HbA1c= Glycated haemoglobin, SBP=Systolic blood pressure, DBP=Diastolic blood pressure, HDL=High density lipoprotein, LDL=Low density lipoprotein. p<0.05 is considered as significant and bold letters represents statistically significant.

**Table S2:** **Adjusted** **Multivariable Logistic Regression Analysis of T2DM, CAD and T2DM+CAD vs control subjects**

| **Factor** | **T2DM vs Control** | | **CAD vs Control** | | **T2DM+CAD vs Control** | |
| --- | --- | --- | --- | --- | --- | --- |
| **OR (95% CI)** | **P-value** | **OR (95% CI)** | **P-value** | **OR (95% CI)** | **P-value** |
| Age (years) | 0.99 (0.83 – 1.18) | 0.889 | 1.33 (1.04 – 1.69) | **0.024** | 1.46 (1.04 – 2.06) | **0.031** |
| Gender (Female) | 0.79 (0.04 – 14.75) | 0.876 | 0.22 (0.001 – 0.98) | **0.049** | 0.22 (0.01 – 5.87) | 0.367 |
| Platelet-Neutrophil aggregates (%) | 1.67 (1.16 – 2.41) | **0.006** | 1.28 (1.06 – 1.55) | **0.011** | 1.56 (1.09 – 2.24) | **0.016** |

p<0.05 is considered as significant and bold letters represents statistically significant.
